# Supplementary material for: State of Knowledge on Sexually Transmitted Infections among Health Professionals and Health Sciences Students in France
Source: MDPI journal article supplement (doi:10.3390/venereology3020006), 2024-04-09
Supplement: s1 [file s1]

# State of Knowledge on Sexually Transmitted Infections among Health Professionals and Health Sciences Students in France

**Supplementary Table S1.** Percentage of responses checked per item out of all applicants in the questionnaire

| <u>Questions</u>                                                                                                                                                                                                                                                                                                          | <u>Global (Health Professionals and Students)</u>                                                                                                                               |
|---------------------------------------------------------------------------------------------------------------------------------------------------------------------------------------------------------------------------------------------------------------------------------------------------------------------------|---------------------------------------------------------------------------------------------------------------------------------------------------------------------------------|
| <b>Gender</b> <ul style="list-style-type: none"> <li>- Male</li> <li>- Female</li> </ul>                                                                                                                                                                                                                                  | 23% (279)<br>77% (934)                                                                                                                                                          |
| <b>Are you?</b> <ul style="list-style-type: none"> <li>- Professional</li> <li>- Student</li> <li>- Other</li> </ul>                                                                                                                                                                                                      | <b>1211</b><br>69,6% (843)<br>27,1% (328)<br>3,3% (40)                                                                                                                          |
| <b>Exclusion from the investigation</b> <ul style="list-style-type: none"> <li>- Others</li> <li>- Did not answer seriously</li> <li>- Another curriculum</li> <li>- Other profession</li> <li>- Physiotherapy student</li> <li>- Pharmacy technician student</li> </ul>                                                  | <b>82</b><br>40<br>5<br>10<br>25<br>1<br>1                                                                                                                                      |
| <b>Total inclusion</b> <ul style="list-style-type: none"> <li>- Student</li> <li>- Professional</li> </ul>                                                                                                                                                                                                                | <b>1129</b><br>27,8% (314)<br>72,2 % (815)                                                                                                                                      |
| <b>What are the STIs that are to be reported?</b> <ul style="list-style-type: none"> <li>- Gonococcal infection</li> <li>- Chlamydia Infection</li> <li>- Syphilis</li> <li>- Acute hepatitis A</li> <li>- Acute hepatitis B</li> <li>- Hepatitis C</li> <li>- Herpes</li> <li>- Papillomavirus</li> <li>- HIV</li> </ul> | <b>10,1% (114/1129)</b><br>15.1 % (172)<br>11,1% (126)<br>58,8% (668)<br><b>37% (420)</b><br><b>51,8% (588)</b><br>44,3% (503)<br>2,7% (31)<br>9,7% (110)<br><b>84,3% (958)</b> |
| <b>Which of these STIs are caused by bacteria?</b>                                                                                                                                                                                                                                                                        | <b>62,7% (708/1129)</b>                                                                                                                                                         |

|                                                                                                                                                                                                                                                                                                                |                                                                                                                                                                                            |
|----------------------------------------------------------------------------------------------------------------------------------------------------------------------------------------------------------------------------------------------------------------------------------------------------------------|--------------------------------------------------------------------------------------------------------------------------------------------------------------------------------------------|
| <ul style="list-style-type: none"> <li>- Gonococcal infection</li> <li>- Chlamydia infection</li> <li>- Syphilis</li> <li>- Acute Hepatitis A</li> <li>- Acute hepatitis B</li> <li>- Hepatitis C</li> <li>- Herpes</li> <li>- Papillomavirus</li> <li>- HIV</li> </ul>                                        | <p><b>95,5% (1095)</b></p> <p><b>88,9% (1010)</b></p> <p><b>72,7% (826)</b></p> <p>2,9% (33)</p> <p>2,5% (28)</p> <p>1,9% (22)</p> <p>3,4% (39)</p> <p>2% (23)</p> <p>0,7% (8)</p>         |
| <p><b>HIV/AIDS infection is transmitted:</b></p> <ul style="list-style-type: none"> <li>- By unprotected sexual intercourse</li> <li>- By blood</li> <li>- Through saliva</li> <li>- By mosquito bites</li> <li>- For the use of public toilets</li> <li>- From the contaminated mother to the baby</li> </ul> | <p><b>71,4 % (806/1129)</b></p> <p><b>99,6% (1131)</b></p> <p><b>99,5% (1130)</b></p> <p>8,4% (95)</p> <p>4,2% (48)</p> <p>0,6% (7)</p> <p><b>81,3% (924)</b></p>                          |
| <p><b>The clinical manifestations of HIV infection:</b></p> <ul style="list-style-type: none"> <li>- Fever, body aches, headache, muscle pain</li> <li>- Rash</li> <li>- Diarrhoea</li> <li>- Shingles</li> <li>- Tuberculosis</li> <li>- No symptoms</li> </ul>                                               | <p><b>14.3% (161/1129)</b></p> <p><b>75,7% (860)</b></p> <p><b>60,1% (683)</b></p> <p><b>44,9% (510)</b></p> <p><b>43,5% (494)</b></p> <p><b>42,4% (482)</b></p> <p><b>59,9% (680)</b></p> |
| <p><b>The diagnosis of HIV infection is based on:</b></p> <ul style="list-style-type: none"> <li>- An ELISA blood screening test</li> <li>- An ELISA blood screening test + a Western-Blot confirmation test</li> <li>- A blood TROD HIV</li> <li>- An HIV blood self-test</li> </ul>                          | <p><b>84,5 % (954/1129)</b></p> <p>10,8% (123)</p> <p><b>92,9% (1055)</b></p> <p>4,1% (47)</p> <p>5,9% (67)</p>                                                                            |
| <p><b>Triple therapy:</b></p> <ul style="list-style-type: none"> <li>- Helps increase the survival of the infected person</li> <li>- Helps cure the infected person</li> <li>- Helps reduce the risk of transmission of infection to sexual partners</li> <li>- Is always well tolerated</li> </ul>            | <p><b>78% (881/1129)</b></p> <p><b>96,1% (1092)</b></p> <p>1,8% (20)</p> <p><b>82,4% (936)</b></p> <p>0,8% (9)</p>                                                                         |
| <p><b>Prevention of HIV infection can be done:</b></p> <ul style="list-style-type: none"> <li>- By using a condom</li> <li>- By the PEP if prescribed before 48 hours</li> </ul>                                                                                                                               | <p><b>31.3% (353/1129)</b></p> <p><b>99,8% (1134)</b></p> <p><b>67,9% (771)</b></p>                                                                                                        |

|                                                                                                                                                                                                                                                             |                                                                                                          |
|-------------------------------------------------------------------------------------------------------------------------------------------------------------------------------------------------------------------------------------------------------------|----------------------------------------------------------------------------------------------------------|
| <ul style="list-style-type: none"> <li>- By a vaccine</li> <li>- By continuous PrEP</li> <li>- By the use of sterile equipment using drugs</li> <li>- By the TPE if it is prescribed after 48 hours</li> </ul>                                              | 0,1% (1)<br>44,7% (508)<br>93,7% (1064)<br>2,9% (33)                                                     |
| <b>Hepatitis A is transmitted:</b> <ul style="list-style-type: none"> <li>- Through oral-anal sex</li> <li>- By feces</li> <li>- By blood</li> <li>- Through urine</li> <li>- Through saliva</li> <li>- Through the use of injecting drugs</li> </ul>       | 27.6% (312/1129)<br>56% (636)<br>82% (931)<br>29% (329)<br>9% (102)<br>19,5% (221)<br>21,1% (240)        |
| <b>The clinical manifestations of hepatitis A can be:</b> <ul style="list-style-type: none"> <li>- Fever, body aches</li> <li>- Jaundice</li> <li>- Diarrhea, nausea</li> <li>- Discolored stools</li> <li>- No symptoms</li> </ul>                         | 15% (170/1129)<br>75,1% (853)<br>83,1% (944)<br>77,2% (877)<br>63,6% (722)<br>22,9% (260)                |
| <b>Screening for hepatitis A virus (HAV) infection is based on:</b> <ul style="list-style-type: none"> <li>- A blood test</li> <li>- A urine test</li> <li>- A saliva test</li> </ul>                                                                       | 91.7% (1035/1129)<br>96% (1091)<br>4,1% (47)<br>3,3% (37)                                                |
| <b>Hepatitis A can progress to:</b> <ul style="list-style-type: none"> <li>- Spontaneous healing</li> <li>- A cure thanks to antivirals</li> <li>- Chronic hepatitis</li> <li>- Liver cancer</li> <li>- Cirrhosis</li> <li>- Fulminant hepatitis</li> </ul> | 24% (271/1129)<br>71,9% (817)<br>28,3% (322)<br>39,4% (448)<br>24,9% (283)<br>30,2% (343)<br>60,5% (687) |
| <b>There is a vaccine against hepatitis A:</b> <ul style="list-style-type: none"> <li>- True</li> <li>- False</li> </ul>                                                                                                                                    | 74.3% (839/1129)<br>74,2% (843)<br>25,8% (293)                                                           |
| <b>Hepatitis B is transmitted:</b> <ul style="list-style-type: none"> <li>- By unprotected sexual intercourse</li> <li>- By blood</li> <li>- Through saliva</li> <li>- Through urine</li> <li>- By mosquito bites</li> </ul>                                | 15% (170/1129)<br>90,8% (1032)<br>97,1% (1103)<br>25,1% (285)<br>7,1% (81)<br>4,7% (53)                  |

|                                                           |                          |
|-----------------------------------------------------------|--------------------------|
| - By injecting drug use                                   | <b>79,6% (904)</b>       |
| <b>The clinical manifestations of hepatitis B can be:</b> | <b>19,4% (217/1129)</b>  |
| - Fever, body aches                                       | <b>74,6% (848)</b>       |
| - Jaundice                                                | <b>84% (954)</b>         |
| - Digestive                                               | <b>69,3% (787)</b>       |
| - Dark urine                                              | <b>57% (647)</b>         |
| - No symptoms                                             | <b>34,9% (397)</b>       |
| <b>Screening for HBV infection is based on:</b>           | <b>95.3% (1076/1129)</b> |
| - A blood test                                            | <b>99% (1125)</b>        |
| - A urine test                                            | 1,6% (18)                |
| - A saliva test                                           | 1,2% (14)                |
| <b>Hepatitis B can progress to:</b>                       | <b>8% (91/1129)</b>      |
| - Spontaneous healing                                     | <b>43,3% (492)</b>       |
| - A cure thanks to antivirals                             | 52,6% (597)              |
| - Chronic hepatitis                                       | <b>93,6% (1063)</b>      |
| - Fulminant hepatitis                                     | <b>59,9% (680)</b>       |
| - Liver cancer                                            | <b>73,1% (830)</b>       |
| - Cirrhosis                                               | <b>75,9% (862)</b>       |
| <b>There is a vaccine against hepatitis B:</b>            | <b>97.7% (1103/1129)</b> |
| - True                                                    | <b>97,6% (1109)</b>      |
| - False                                                   | 2,4% (27)                |
| <b>Hepatitis C can be transmitted:</b>                    | <b>12% (136/1129)</b>    |
| - By unprotected sexual intercourse                       | 77,8% (884)              |
| - By blood                                                | <b>95,1% (1080)</b>      |
| - Through tattoos, piercings                              | <b>80,8% (918)</b>       |
| - Through urine                                           | 4,8% (54)                |
| - By mosquito bites                                       | 4,3% (49)                |
| - Through the use of injecting drugs                      | <b>81,6% (927)</b>       |
| <b>The clinical manifestations of hepatitis C can be:</b> | <b>24.4% (276/1129)</b>  |
| - Fever, body aches                                       | <b>73,2% (831)</b>       |
| - Jaundice                                                | <b>79,3% (901)</b>       |
| - Diarrhea, nausea                                        | <b>63,7% (724)</b>       |
| - Asthenia                                                | <b>84,2% (957)</b>       |
| - No symptoms                                             | <b>37,1% (421)</b>       |
| <b>Screening for HCV infection is based on:</b>           | <b>96.3% (1087/1129)</b> |
| - A blood test                                            | <b>98,7% (1121)</b>      |
| - A urine test                                            | 2,2% (25)                |

|                                                                                                                                                                                                                                                                                                         |                                                                                                           |
|---------------------------------------------------------------------------------------------------------------------------------------------------------------------------------------------------------------------------------------------------------------------------------------------------------|-----------------------------------------------------------------------------------------------------------|
| - A saliva test                                                                                                                                                                                                                                                                                         | 2% (23)                                                                                                   |
| <b>Hepatitis C can progress to:</b> <ul style="list-style-type: none"> <li>- Spontaneous healing</li> <li>- A cure thanks to antivirals</li> <li>- Chronic hepatitis</li> <li>- Fulminant hepatitis</li> <li>- Liver cancer</li> <li>- Cirrhosis</li> </ul>                                             | 6.5% (74/1129)<br>35,4% (402)<br>58,9% (669)<br>89,6% (1018)<br>55,7% (633)<br>72,7% (826)<br>73,9% (839) |
| <b>There is a vaccine against hepatitis C:</b> <ul style="list-style-type: none"> <li>- True</li> <li>- False</li> </ul>                                                                                                                                                                                | 88% (994/1129)<br>12% (136)<br>88,1% (1001)                                                               |
| <b>Syphilis can be transmitted:</b> <ul style="list-style-type: none"> <li>- By unprotected sexual intercourse</li> <li>- By penile-oral sexual contact</li> <li>- Through tattoos, piercings</li> <li>- Through urine</li> <li>- By skin or mucous contact</li> <li>- By injecting drug use</li> </ul> | 39.4% (445/1129)<br>99,6% (1132)<br>80% (909)<br>9,9% (113)<br>3,7% (42)<br>56,2% (638)<br>15,7% (178)    |
| <b>The clinical manifestations of syphilis can be:</b> <ul style="list-style-type: none"> <li>- Fever, body aches</li> <li>- Digestive disorders</li> <li>- Rash</li> <li>- Cancer</li> <li>- Hearing problems</li> <li>- No symptoms</li> </ul>                                                        | 4.2% (48/1129)<br>58,3% (662)<br>20,4% (232)<br>74,9% (851)<br>90,9% (1033)<br>27,6% (314)<br>20,7% (235) |
| <b>Syphilis screening is based on:</b> <ul style="list-style-type: none"> <li>- A blood test</li> <li>- A urine test</li> <li>- A saliva test</li> </ul>                                                                                                                                                | 84% (949/1129)<br>90,8% (1032)<br>13,8% (157)<br>3,3% (37)                                                |
| <b>Syphilis can progress to:</b> <ul style="list-style-type: none"> <li>- A cure thanks to antivirals</li> <li>- Cardiac complications</li> <li>- Cancer</li> <li>- Dementia</li> <li>- Renal complications</li> <li>- Possible recontamination after healing</li> </ul>                                | 7.2% (82/1129)<br>24% (273)<br>52,1% (592)<br>8,1% (92)<br>60,2% (684)<br>48,4% (550)<br>68,3% (776)      |
| <b>There is a vaccine against syphilis:</b> <ul style="list-style-type: none"> <li>- True</li> <li>- False</li> </ul>                                                                                                                                                                                   | 98.2% (1108/1129)<br>1,9% (22)<br>98,1% (1114)                                                            |

|                                                                                                                                                                                                                                                                                                    |                                                                                                                                                 |
|----------------------------------------------------------------------------------------------------------------------------------------------------------------------------------------------------------------------------------------------------------------------------------------------------|-------------------------------------------------------------------------------------------------------------------------------------------------|
| <b>HPV can be transmitted:</b> <ul style="list-style-type: none"> <li>- By unprotected sexual intercourse</li> <li>- By penile-oral sexual contact</li> <li>- Through tattoos, piercings</li> <li>- Through urine</li> <li>- By skin or mucous contact</li> <li>- By injecting drug use</li> </ul> | <b>41.1% (465/1129)</b><br><b>98,8% (1122)</b><br><b>66,9% (760)</b><br>3,8% (43)<br>1,7% (19)<br><b>58,1% (660)</b><br>4% (45)                 |
| <b>The clinical manifestations of HPV can be:</b> <ul style="list-style-type: none"> <li>- Genital warts</li> <li>- Molluscum contagiosum</li> <li>- Cervical abnormality</li> <li>- Lesion of the oral cavity</li> <li>- <b>Cancer</b></li> <li>- Anal lesions</li> </ul>                         | <b>31.3% (353/1129)</b><br><b>89,2% (1013)</b><br>28,3% (321)<br><b>88,6% (1007)</b><br><b>59,6% (677)</b><br>10,4% (118)<br><b>73,5% (835)</b> |
| <b>The definitive diagnosis of HPV is based on:</b> <ul style="list-style-type: none"> <li>- A blood test</li> <li>- A urine test</li> <li>- A biopsy/smear</li> </ul>                                                                                                                             | <b>81.6% (922/1129)</b><br>17,2% (195)<br>1,8% (20)<br><b>95,6% (1086)</b>                                                                      |
| <b>HPV can progress to:</b> <ul style="list-style-type: none"> <li>- A cure thanks to antivirals</li> <li>- Cervical cancer</li> <li>- Anal cancer</li> <li>- ENT cancer</li> <li>- Recurrent lesions</li> <li>- A cure thanks to antibiotics</li> </ul>                                           | <b>33% (373/1129)</b><br>23,6% (268)<br><b>98% (1113)</b><br><b>64,1% (728)</b><br><b>58,3% (662)</b><br><b>74,4% (845)</b><br>4,9% (56)        |
| <b>There is a vaccine against HPV:</b> <ul style="list-style-type: none"> <li>- True</li> <li>- False</li> </ul>                                                                                                                                                                                   | <b>96.3% (1087/1129)</b><br><b>96,3% (1094)</b><br>3,7% (42)                                                                                    |
| <b>Chlamydia can be transmitted:</b> <ul style="list-style-type: none"> <li>- By unprotected sexual intercourse</li> <li>- By penile-oral sexual contact</li> <li>- Through saliva</li> <li>- By mucosal contact</li> <li>- Through urine</li> <li>- Through the use of injecting drugs</li> </ul> | <b>31.3% (353/1129)</b><br><b>98,9% (1123)</b><br><b>63,7% (724)</b><br>12,9% (147)<br><b>63,7% (724)</b><br>9,5% (108)<br>2,8% (32)            |
| <b>Clinical manifestations of chlamydia infection:</b> <ul style="list-style-type: none"> <li>- Urinary burns</li> <li>- Redness and pain in the anus</li> <li>- Itching around the vulva</li> </ul>                                                                                               | <b>12.2% (138/1129)</b><br><b>84,1% (955)</b><br><b>48,1% (546)</b><br><b>78,8% (895)</b><br><b>83,9% (953)</b>                                 |

|                                                                                                                                                                                                                                                                                               |                                                                                                                                             |
|-----------------------------------------------------------------------------------------------------------------------------------------------------------------------------------------------------------------------------------------------------------------------------------------------|---------------------------------------------------------------------------------------------------------------------------------------------|
| <ul style="list-style-type: none"> <li>- Discharge from the glans</li> <li>- <b>Cancer</b></li> <li>- No symptoms</li> </ul>                                                                                                                                                                  | 12,2% (139)<br><b>36,8% (418)</b>                                                                                                           |
| <b>Screening for chlamydia infection is based on:</b> <ul style="list-style-type: none"> <li>- A blood test</li> <li>- A urine test</li> <li>- A swab (anus, pharynx)</li> <li>- A vaginal sample</li> </ul>                                                                                  | 16.8% (138/1129)<br>26,9% (306)<br><b>43,2% (491)</b><br><b>63,1% (717)</b><br><b>89,2% (1013)</b>                                          |
| <b>Chlamydia infection can progress to:</b> <ul style="list-style-type: none"> <li>- A cure thanks to antivirals</li> <li>- Cervical cancer</li> <li>- Anal cancer</li> <li>- Sterility</li> <li>- Possible recontamination after recovery</li> <li>- A cure thanks to antibiotics</li> </ul> | 46.3% (523/1129)<br>6,3% (71)<br>15,5% (176)<br>10,5% (119)<br><b>83,9% (953)</b><br><b>69,9% (794)</b><br><b>84,9% (965)</b>               |
| <b>There is a vaccine against chlamydia infection:</b> <ul style="list-style-type: none"> <li>- True</li> <li>- False</li> </ul>                                                                                                                                                              | 99.4% (1122/1129)<br>0,6% (7)<br><b>99,4% (1129)</b>                                                                                        |
| <b>Gonococcus can be transmitted:</b> <ul style="list-style-type: none"> <li>- By unprotected sexual intercourse</li> <li>- By penile-oral sexual contact</li> <li>- By blood</li> <li>- Through saliva</li> <li>- By mucosal contact</li> <li>- By injecting drug use</li> </ul>             | 31.3% (354/1129)<br><b>98,2% (1115)</b><br><b>62,9% (715)</b><br>10,7% (121)<br>10,7% (121)<br><b>60% (682)</b><br>3,1% (35)                |
| <b>Clinical manifestations of gonococcal infection:</b> <ul style="list-style-type: none"> <li>- Urinary burns</li> <li>- Redness and pain in the anus</li> <li>- Itching around the vulva</li> <li>- Discharge from the glans</li> <li>- Canker</li> <li>- No symptoms</li> </ul>            | 8.7% (98/1129)<br><b>85,3% (969)</b><br><b>50,5% (574)</b><br><b>71,5% (812)</b><br><b>85,3% (963)</b><br>13,5% (153)<br><b>23,7% (269)</b> |
| <b>Screening for gonococcal infection is based on:</b> <ul style="list-style-type: none"> <li>- A blood test</li> <li>- A urine test</li> <li>- A swab (anus, pharynx)</li> <li>- A vaginal sample</li> </ul>                                                                                 | 17% (191/1129)<br>21,6% (245)<br><b>39,6% (450)</b><br><b>65,8% (748)</b><br><b>81,8% (929)</b>                                             |

|                                                                                                                                                                                                                                                                                                         |                                                                                                                                                      |
|---------------------------------------------------------------------------------------------------------------------------------------------------------------------------------------------------------------------------------------------------------------------------------------------------------|------------------------------------------------------------------------------------------------------------------------------------------------------|
| <b>Gonococcal infection can progress to:</b> <ul style="list-style-type: none"> <li>- A cure thanks to antivirals</li> <li>- Cervical cancer</li> <li>- Anal cancer</li> <li>- Sterility</li> <li>- Possible recontamination after recovery</li> <li>- A cure thanks to antibiotics</li> </ul>          | <b>31.5% (356/1129)</b><br>4,5% (51)<br>9,4% (107)<br>9,2% (104)<br><b>54,9% (624)</b><br><b>68,2% (775)</b><br><b>86,9% (987)</b>                   |
| <b>There is a vaccine against gonococcal infection:</b> <ul style="list-style-type: none"> <li>- True</li> <li>- False</li> </ul>                                                                                                                                                                       | <b>98.2% (1109/1129)</b><br>1,9% (22)<br><b>98,2% (1116)</b>                                                                                         |
| <b>Herpes can be transmitted:</b> <ul style="list-style-type: none"> <li>- By unprotected sexual intercourse</li> <li>- By penile-oral sexual contact</li> <li>- By kisses</li> <li>- By skin or mucous contact</li> <li>- Through urine</li> <li>- Through the use of injecting drugs</li> </ul>       | <b>70.7% (799/1129)</b><br><b>96,8% (1100)</b><br><b>89,7% (1019)</b><br><b>92,1% (1046)</b><br><b>91% (1034)</b><br>2% (23)<br>7,2%(82)             |
| <b>Clinical manifestations of herpes can be:</b> <ul style="list-style-type: none"> <li>- Burns</li> <li>- Edema and redness</li> <li>- Cold sores</li> <li>- Vesicles in the genitals</li> <li>- Fever</li> <li>- - No symptoms</li> </ul>                                                             | <b>23.2% (262/1129)</b><br><b>77,3% (878)</b><br><b>64,3% (730)</b><br><b>94,1% (1069)</b><br><b>97,4% (1106)</b><br><b>63% (716)</b><br>23,5% (267) |
| <b>The diagnosis of herpes is based on:</b> <ul style="list-style-type: none"> <li>- A blood test</li> <li>- A urine test</li> <li>- A saliva test</li> <li>- A swab of the lesion</li> </ul>                                                                                                           | <b>47.1% (532/1129)</b><br>46,7% (530)<br>3,3% (37)<br>9,3% (106)<br><b>90,7% (1030)</b>                                                             |
| <b>Herpes infection can progress to:</b> <ul style="list-style-type: none"> <li>- A cure thanks to antivirals</li> <li>- A cure thanks to antibiotics</li> <li>- Disappearance of lesions du to antivirals</li> <li>- Recurrences with flare-ups</li> <li>- Sterility</li> <li>- Anal cancer</li> </ul> | <b>42% (474/1129)</b><br>39,5% (449)<br>3,7% (42)<br><b>84,4% (959)</b><br><b>97,4% (1107)</b><br>16,2% (184)<br>7,2% (82)                           |
| <b>There is a vaccine against herpes:</b> <ul style="list-style-type: none"> <li>- True</li> <li>- False</li> </ul>                                                                                                                                                                                     | <b>96.4% (1089/1129)</b><br>3,5% (40)<br><b>96,5% (1096)</b>                                                                                         |
